# Supplementary material
Source: HighWire-hosted journal article supplement (https://rapm.bmj.com/content/45/4/260)

## 1A

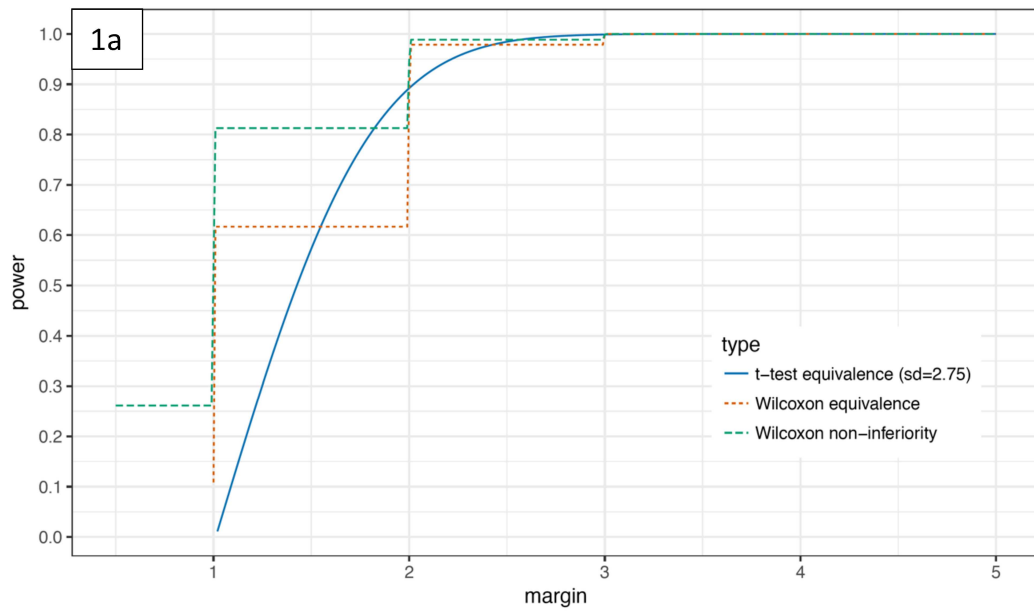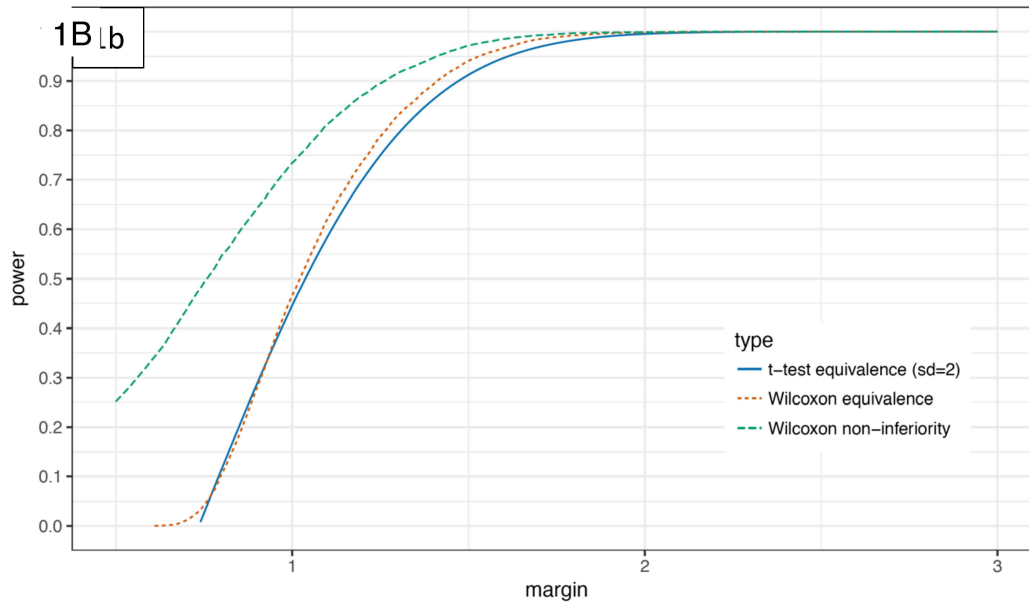

Supplement: inline-supplementary-material-1 [file inline-supplementary-material-1.pdf]
